# Supplementary material for: Exome Sequencing of 963 Chinese Families Identifies Novel Epilepsy Candidate Genes
Source: Research Square preprint supplement (doi:10.21203/rs.3.rs-4215666/v1), 2024-07-08
Supplement: Supplementary file 1 [file 1966f371c5a35745d3953c01.xlsx]

## Sheet: Index
Supplementary Table 1. The demographic and clinical characteristics of 963 patients in the present study
Supplementary Table 2. KEGG enrichment results using 15 candidate genes in the present study and 978 known epilepsy genes in the Genes4Epilepsy database.
Supplementary Table 3. Guide RNAs (gRNAs) that were used to generate F0 zebrafish knockouts
Supplementary Table 4. Plasmid constructs that were used in the overexpression experiments in H293 cells. We constructed 33 plasmids including 11 for wide type (WT) and 22 for variants
Supplementary Table 5. The clinical characteristics of three patients carrying pathogenic mutations in CRTC2
Supplementary Table 6. The clinical characteristics of the patients carrying novel epilepsy candidate genes
Supplementary Table 7. The primer sequences for constructing plasmids of novel epilepsy candidates. F- forward primer, R- reverse primer

## Sheet: Supplementary Table 1
Supplementary Table 1. The demographic and clinical characteristics of 963 patients in the present study
Variables	Total (n, %)	Patients with pathogenic or likely pathogenic variants based on ES (n, %)	Patients with negative clinical diagnoses based on ES (n, %)
Total	963	381	582
Age at seizure onset
Neonatal (0–1 month)	52 (5.4%)	39 (10.2%)	13 (2.2%)
Infancy (1 month–1 year)	306 (31.8%)	179 (47.0%)	127 (21.8%)
Toddler (1–3 years)	204 (21.2%)	79 (20.7%)	125 (21.5%)
Early childhood (3–6 years)	207 (21.5%)	42 (11.0%)	165 (28.4%)
Middle childhood (6–12 years)	169 (17.5%)	33 (8.7%)	136 (23.4%)
Adolescent (12–18 years)	21 (2.2%)	7 (1.8%)	14 (2.4%)
Unknown	4 (0.4%)	2 (0.6%)	2 (0.3%)
Sex
Male	573 (59.5%)	220 (57.7%)	353 (60.7%)
Female	390 (40.5%)	161 (42.3%)	229 (39.3%)
Seizure type
Focal onset	654 (67.9%)	239 (62.7%)	415 (71.3%)
Generalized onset	291 (30.2%)	134 (35.2%)	157 (27.0%)
Unknown onset	18 (1.9%)	8 (2.1%)	10 (1.7%)
Classification
DEE	422 (43.8%)	236 (61.9%)	186 (32.0%)
GGE	140 (14.5%)	45 (11.8%)	95 (16.3%)
NAFE	389 (40.4%)	95 (24.9%)	294 (50.5%)
Unclassified epilepsy	12 (1.3%)	5 (1.4%)	7 (1.2%)
Neuropsychiatric comorbidities
Intellectual disability	422 (43.8%)	236 (61.9%)	186 (32.0%)
ADHD	125 (13.0%)	38 (10.0%)	87 (15.0%)
ASD	44 (4.6%)	20 (5.3%)	24 (4.1%)
Tic disorders	20 (2.1%)	5 (1.3%)	15 (2.6%)
Migraine	5 (0.5%)	0 (0.0%)	5 (0.9%)
Intractable epilepsy	363 (37.7%)	158 (41.5%)	205 (35.2%)
Brain MRI
With findings	525 (54.5%)	222 (58.3%)	303 (52.1%)
No findings	384 (39.9%)	135 (35.4%)	249 (42.8%)
Unknown	54 (5.6%)	24 (6.3%)	30 (5.1%)
ADHD: attention deficit hyperactivity disorder; ASD: autistic spectrum disorder; DEE: developmental and epileptic encephalopathy; ES: exome sequencing; GGE: genetic generalized epilepsy; MRI: magnetic resonance imaging; NAFE: nocturnal frontal lobe epilepsy.

## Sheet: Supplementary Table 2
Supplementary Table 2. KEGG enrichment results of 15 candidate genes in the gene set
Candidate Genes	KEGG pathway	PValue	Benjamini
ADCY2	Metabolic pathways	1.51e-26	4.91e-24
ADCY2	GABAergic synapse	2.76e-13	2.23e-11
ADCY2	Retrograde endocannabinoid signaling	2.9e-12	1.88e-10
ADCY2	Thermogenesis	8.1e-09	3.75e-07
ADCY2	Glutamatergic synapse	1.4e-07	4.54e-06
ADCY2	Cholinergic synapse	1.42e-06	3.07e-05
ADCY2	Circadian entrainment	4.68e-06	6.59e-05
ADCY2	Morphine addiction	6.17e-06	8.33e-05
ADCY2	cAMP signaling pathway	1.34e-05	0.000161
ADCY2	Insulin secretion	0.000125	0.00116055
ADCY2	Gap junction	0.00425369	0.0233592
ADCY2	Aldosterone synthesis and secretion	0.0110533	0.0497398
ADCY2	Relaxin signaling pathway	0.0119999	0.0518394
ADCY2	Oxytocin signaling pathway	0.0160088	0.0664981
ADCY2	Adrenergic signaling in cardiomyocytes	0.0160088	0.0664981
ADCY2	Gastric acid secretion	0.0208835	0.0834468
ADCY2	Phospholipase D signaling pathway	0.0213768	0.0834468
ADCY2	Growth hormone synthesis, secretion and action	0.0271772	0.101212
ADCY2	Longevity regulating pathway - multiple species	0.0311932	0.113557
ADCY2	Endocrine resistance	0.051476	0.17194
ADCY2	Longevity regulating pathway	0.057302	0.187376
ADCY2	Cushing syndrome	0.0578322	0.187376
ADCY2,RASGRP2	Rap1 signaling pathway	0.00261044	0.016265
RASGRP2	Ras signaling pathway	0.00362907	0.0209968
RASGRP2	MAPK signaling pathway	0.0472893	0.161281
ZFHX3	Signaling pathways regulating pluripotency of stem cells	0.096266	0.265962
GABAergic: Gamma-aminobutyric acidergic; cAMP: Cyclic adenosine monophosphate; MAPK: Mitogen-activated protein kinase.

## Sheet: Supplementary Table 3
Supplementary Table 3. Guide RNAs (gRNAs) that were used to generate F0 zebrafish knockouts
Human gene	Zebrafish ortholog	gRNA-1	gRNA-2	gRNA-3
BCAR3	bcar3	GGATCTATACGTGTAGAGGCAGG	GGAGGAAGCTCTCCGACTGATGG	GGGGTGTACAGGAAGTCTGGAGG
BSCL2	bscl2	GGTGAAGGACTGCCAACCATGGG	GGTAGTGCAGCATCGTCTGATGG	GGTGTGGAGAAGCTGACGCTGGG
CRTC2	crtc2	GGATTGCAGCTTCCAGGCGTCGG	GGCTGAGCTGGGCTCTCTTCCGG	GGTAGTGATCCTCCATAATACGG
CSMD2	csmd2	GGATATCCATACGGGTATCCGGG	GGATTTCCACATGTGTAGCTTGG	GGGGAGGTGATGATCCCACTCGG
KDM6B	kdm6bb	GGGACTCCTTCCCCTCTTCTGGG	GGGCCGTACAACCTATGAACTGG	GGCTCACTGCACCTATAGCGAGG
KIF1B	kif1b	GGCCTCTTCTCCGCCTGGCGTGG	GGCTGCAGAGACTCCAGATGAGG
PLEKHM3	plekhm3	GGAGTTCAGCTTGTCCAAGGTGG	GGTAGATGACCTGGCCAGTGTGG	GGGTGCTCGTAACTGCACACGGG
RASGRP2	rasgrp2	GGAGGATTGCTCTGCACGAGGG	GGCCGAGCATCTGACCTACCTGG
SGSM2	sgsm2	GGGGCAGGAGACCCGTCTCCAGG	GGACTCCTGTCCTGTGCTCTGGG	GGGTTTCTGCCGTCTGATGAAGG
ZFHX3	zfhx3	GGGGGATCCCCTGTAGATTTGGG	GGGATCTGAGGGGCATAGTATGG

## Sheet: Supplementary Table 4
Supplementary Table 4. Plasmid constructs that were used in the overexpression experiments in H293 cells. We constructed 33 plasmids including 11 for wide type (WT) and 22 for variants
Gene	Plasmids
ADCY2	ADCY2-WT; ADCY2-A253T
BCAR3	BCAR3-WT; BCAR3-A668V; BCAR3-V163L; BCAR3-E426Gfs*5
CDC45	CDC45-WT; CDC45-Q356E
CHRNG	CHENG-WT; CHENG-V118M; CHENG-V258A
CRTC2	CRTC2-WT; CRTC2-R58X; CRTC2-R200Q; CRTC2-I617V
KDM6B	KDM6B-WT; KDM6B-K1537N; KDM6B-R997Q
KIF1B	KIF1B-WT; KIF1B-E926K; KIF1B-Y1022H; KIF1B-R1656W
PLEKHM3	PLEKHM3-WT; PLEKHM3-S746R
PPP4R1	PPP4R1-WT; PPP4R1-P33S; PPP4R1-V229I; PPP4R1-N880D
RASGRP2	RASGRP2-WT; RASGRP2-R543C; RASGRP2-A53P
SGSM2	SGSM2-WT; SGSM2-R711C

## Sheet: Supplementary Table 5
Supplementary Table 5. The clinical characteristics of three patients carrying pathogenic mutations in CRTC2
Patient ID	D133	D285	D308
Diagnosis	Epilepsy (SeLECTS)	Epilepsy, ASD, Arachnoid cyst, Mental retardation	Epilepsy (GEFS+, SE)
Age of onset	Early childhood	Adolescent	Early childhood
Seizure type	Focal to bilateral tonic-clonic	Generalized onset, tonic-clonic	Generalized onset, tonic
Refractory epilepsy	Yes	No treatment	No
Treatment	Previous treatment：LEV, VPA	No treatment	CLZ (prophylactic application, seizure free at 4y)
	Current treatment：OXC (seizure free at 7y9m)
Comorbidity	Normal	ID, ASD, Thyroid dysfunction	Normal
EEG	Multiple asymmetric spike wave/slow spike wave discharges in bilateral Rolandic region, and the right middle temporal region was significant	Mild abnormal EEG showed that the power of theta band was mainly increased in the two occipital regions	Widespread high amplitude slow wave mixed with slightly more spike-wave discharges during sleep period
MRI	Sulcus slightly wide, possible left temporal small arachnoid cyst, the left ventricular temporal horn slightly full	Temporal arachnoid cyst	Normal
Physical examination	Normal	Wide eye distance and flat nose bridge	Normal
Developmental assessment	Normal development	Moderate ID	Normal development
Family history	Mother had afebrile seizures for 3 times in childhood, which could be controlled by treatment	No family history of neurological disease	Father and brother had history of febrile seizures in childhood, and uncle and grandfather's daughter had history of epilepsy in childhood
ASD: autistic spectrum disorder; CLZ: clonazepam; EEG: electroencephalogram; GEFS+: genetic epilepsy with febrile seizures plus; ID: intellectual disability; LEV: levetiracetam; MRI: magnetic resonance imaging; OXC: oxcarbazepine; SE: Status epilepticus; SeLECTS: self-limited epilepsy with centrotemporal spikes; VPA: valproic acid; m: month, y: year.
No treatment means that patient had not been on long-term antiseizure medication after the initial period of their convulsive attack and were only on clinical follow-up.

## Sheet: Supplementary Table 6
Supplementary Table 6. The clinical characteristics of the patients carrying novel epilepsy candidate genes
Family ID	Patient ID	Gene	Mutation	Mutation type	Mutation source	Gender	Date of birth	Diagnosis	Age of onset	Epilepsy classification	Seizure type	Refractory epilepsy	Anti-seizure medication history	Treatment response	Drug lead to seizure free	Comorbidity	EEG	MRI	Physical examination	Developmental assessment	Family history
D476	D476_C1	CSMD2	c.C9296G:p.P3099R	Missense	Paternal	Male	2018-09-28	Epilepsy (SE)	Toddler	NAFE	Focal onset, clonic	No	LEV	Seizure free at 3y	LEV	No	Focal epilepsy discharge in left anterior median temporal lobe	Normal	Normal	Normal	Father： afebrile seizure; Grandfather's cousin: seizures
DDN21001572	DDN21001572_C1	CSMD2	c.10077dupT:p.V3360Cfs*99	frameshift	De novo	Female	2012-10-16	Epilepsy	Middle childhood	GGE	Generalized onset, tonic	No	OXC	Seizure free at 9y	OXC	No	Extensive epilepsy discharge	Bilateral frontal lobe demyelination	Normal	Normal	No
DDN20011629	DDN20011629_C1	CSMD2	c.C3451T:p.L1151F	Missense	Paternal	Female	2003-05-12	Epilepsy (JME)	Adolescent	GGE	Generalized onset, clonic	No	VPA, LEV	Seizure free at 17y7m	VPA	No	No recorded epileptic discharge	High signal in bilateral hippocampal	Normal	Normal	Father： epilepsy
D353	D353_C1	CSMD1	c.6313G>A, p.V2105M	Missense	Paternal	Male	2016-03-03	Epilepsy	Early childhood	GGE	Generalized onset, atonic	No	No treatment	Seizure free at 4y1m	No treatment	No	No recorded epileptic discharge	Normal	Normal	Normal	Father: febrile seizure
D417	D417_C1	CSMD1	c.2338G>A, p.D780N	Missense	Paternal	Male	2016-08-30	Epilepsy, ID	Toddler	DEE	Generalized onset, tonic-clonic	No	VPA	Seizure free at 3y5m	VPA	ID	No recorded epileptic discharge	Abnormal signals in the posterior horn of the ventricles on both sides	Normal	Mild ID	Father and mother: febrile seizures
		ZFHX3	c.G5456C,p.S1819T	Missense	De novo
DH05	DH05_C1	CSMD1	c.C4924G,p.P1642A	Missense	De novo	Male	2015-12-14	Epilepsy (IS), ASD	Toddler	DEE	Generalized onset, spasm	Yes	Previous treatment: ketogenic diet, current treatment: VPA, LEV, CLB, VGB	Seizure free at 5y2m	LEV	ID, ASD	Hypsarrhythmia	Normal	Normal	Moderate to severe ID	No
DHP8	DHP8_C1	CSMD1	c.G1654C,p.E552Q	Missense	Paternal	Female	2014-11-21	Epilepsy	Middle childhood	NAFE	Focal onset, tonic-clonic	No	No treatment	No treatment	No treatment	No	Focal epilepsy discharge in Rolandic region	Normal	Normal	Normal	Father: febrile seizures
D262	D262_C1	CHRNG	c.352G>A, p.V118M	Missense	Paternal	Male	2014-05-27	Epilepsy (SE)	Early childhood	NAFE	Focal onset, tonic	No	LEV	Seizure free at 4y7m	LEV	No	Focal epilepsy discharge in parietal lobe	Normal	Normal	Normal	Father: epilepsy (occipital lobe)
		ZFHX3	c.G5456C,p.S1819T	Missense	Paternal
D217	D217_C1	CHRNG	c.773T>C, p.V258A	Missense	Maternal	Male	2018-09-29	Epilepsy (SE)	Infancy	NAFE	Focal onset, tonic-clonic, behavior arrest	Yes	VPA, LEV	Ineffective	Ineffctive	No	No recorded epileptic discharge	Deep frontotemporal sulci, large cisterna magna, and the bilateral ventricles were asymmetrical	Hand dorsiflexion	Normal	Mother: febrile seizure
		CDC45	c.1066C>G，p.Q356E	Missense	Maternal
D034	D034_C1	SGSM2	c.2131C > T, p.R711C	Missense	Paternal, brother	Female	2016-11-01	Epilepsy	Infancy	NAFE	Focal onset, tonic	No	LEV	Seizure free at 8m	LEV	No	No recorded epileptic discharge	Bilateral frontotemporal subarachnoid widening	Stereotyped behavior such as looking at hands and clapping hands	Normal	Brother, father, mother’s brother ：febrile seizures
		PPP4R1	c.97C>T, p.P33S	Missense	Paternal, brother
D411	D411_C1	SGSM2	c.2131C > T, p.R711C	Missense	Paternal	Female	2013-03-20	Epilepsy (SeLECTS)	Middle childhood	NAFE	Focal onset, tonic-clonic	No	No treatment	No treatment	No treatment	Hip dysplasia	Focal epilepsy discharge in Rolandic region, NREM phase discharge index reach 50-60%	Normal	Normal	Normal	No
D227	D227_C1	SGSM2	c.2131C > T, p.R711C	Missense	Paternal	Male	2016-08-25	Epilepsy	Infancy	NAFE	Focal onset, tonic	No	LEV	Seizure free at 6m	LEV	No	No recorded epileptic discharge	Normal	Normal	Normal	Nine members including father and brother: epilepsy
		PLEKHM3	c.2236A>C，p.S746R	Missense	Paternal, brother
D008	D008_C1	ADCY2	c.757G>A，p.A253T	Missense	De novo	Female	2013-10-13	Epilepsy (SeLECTS)	Early childhood	NAFE	Focal onset, tonic	Yes	Previous treatment: OXC, CBZ, VPA, PER Current treatment: LEV, TPM, CLZ	Seizure free at 7y6m	CLZ	No	Focal epilepsy discharge in Rolandic region	Bilateral frontal lobe spotted demyelinating foci	Normal	Normal，significant decline in learning ability after seizure onset	Mother's cousin: epilepsy
D179	D179_C1	ADCY2	c.757G>A，p.A253T	Missense	De novo	Female	2012-07-03	Epilepsy (Atypical SeLECTS，ESES)	Early childhood	NAFE	Focal onset, tonic	Yes	Previous treatment: OXC, Ketogenic diet Current treatment: VPA, LEV	Seizure free at 7y9m	LEV	ADHD	Focal epilepsy discharge in Rolandic region, NREM phase discharge index reach 50-60%	Abnormal signals in the right centrum semiovale and right basal ganglia	Normal	Normal，significant decline in learning ability after seizure onset	No
D120	D120_C1	BCAR3	c.487G>T, p.V163L	Missense	Paternal	Male	2012-03-29	Epilepsy (Frontal lobe)	Early childhood	NAFE	Focal onset, behavior arrest	No	VPA	Seizure free at 5y6m	VPA	No	Multifocal epilepsy discharge	Normal	Hypopigmentation spot	Normal	Father: epilepsy (frontal lobe)
D211	D211_C1	BCAR3	c.487G>T, p.V163L	Missense	Maternal	Male	2013-02-08	Epilepsy (GEFS+)	Infancy	NAFE	Focal onset, tonic-clonic	No	VPA, OXC	Seizure free at 7y	VPA	No	Focal epilepsy discharge in fore head	Normal	Cafe-au-Lait Spots, short jaw	Normal	Father and mother: febrile seizures , grandfather and grandmather: seizure
DDN21003493	DDN21003493_C1	BCAR3	c.1275_1276del:p.E426Gfs*5	frameshift	NA	Female	1992-07-22	Epilepsy	Middle childhood	GGE	Generalized onset, tonic-clonic	No	Previous treatment: PHT, current treatment: VPA, LTG	Seizure free at 12y, relapsed at 22y, and recontrolled at 28y	LTG	No	Focal epilepsy discharge in fore head	Normal	Normal	Normal	No
DD19009922	DD19009922_C1	RASGRP2	c.G157C:p.A53P	Missense	Maternal	Female	1996-03-29	Epilepsy (SE)	Early childhood	NAFE	Focal onset, automatism, cognitive, tonic-clonic	Yes	Previous treatment: LEV, OXC, LTG, current treatment: PER, ZNS	Reduced <50%	No treatment	No	Sharp and sharp-slow waves	Cyst of cisterna occipitalis magnus	Normal	Normal	Mother: Febrile seizure; Father: Episodic cognitive impairment; Grandfather: Episodic loss of consciousness
D133	D133_C1	PPP4R1	c.97C>T, p.P33S	Missense	Maternal	Male	2012-07-16	Epilepsy (SeLECTS)	Early childhood	NAFE	Focal onset, tonic-clonic	Yes	Previous treatment: LEV, VPA; current treatment OXC	Seizure free at 7y9m	OXC	No	Focal epilepsy discharge in Rolandic region	Wide sulci, arachnoid cyst, dilated temporal horn	Normal	Normal	Mother : seizures
		SYNE1	c.15494A>T, p.K5165I	Missense	Maternal
		CRTC2	c.599G > A; p.R200Q	Missense	Maternal
DD19002122	DD19002122_C1	PPP4R1	c.A2638G:p.N880D	Missense	De novo	Male	2007-06-01	Epilepsy (IS), ID, ASD	Early childhood	DEE	Focal onset, tonic, spasm	Yes	Previous treatment: LEV, VPA, LTG, NZP, CLZ, ZNS, PRED current treatment: LTG, CLB	Seizure free at 6y9m	PRED	ID, ASD	Multifocal epilepsy discharge, ESES	Periventricular leukomalacia	Bilateral Babinski sign and ankle clonus positive, ataxic gait	Moderate to severe ID	Twin brother: Epilepsy (IS), ID
D148	D148_C1	PPP4R1	c.685G>A, p.V229I	Missense	Maternal	Female	2017-05-06	Epilepsy, ID	Infancy	DEE	Generalized onset, tonic-clonic	No	VPA	Seizure free at 10m	VPA	ID	No recorded epileptic discharge	Normal	Normal	Mild ID	Mother : febrile and afebrile seizure. Father: suspected seizure. Father's sister: afebrile seizures
D308	D308_C1	KIF1B	c.G2776A,p.E926K	Missense	Paternal	Female	2012-03-02	Epilepsy (GEFS+, SE)	Early childhood	GGE	Generalized onset, tonic	No	CLZ (prophylactic application)	Seizure free at 4y	CLZ	No	Extensive epilepsy discharge	Normal	Normal	Normal	Father and brother : febrile seizures. Mother‘s brother and grandfather's daughter ：epilepsy
		CRTC2	c.1849A > G; p.I617V	Missense	Paternal, brother
D040	D040_C1	KIF1B	c.T3064C,p.Y1022H	Missense	Maternal	Female	2012-08-13	Epilepsy (GEFS+, )	Toddler	GGE	Generalized onset, tonic-clonic	No	CLZ (prophylactic application)	Seizure free at 2y7m	CLZ	No	No recorded epileptic discharge	Delayed myelination	Normal	Normal	Mother: febrile seizure
D539	D539_C1	KIF1B	c.C4966T,p.R1656W	Missense	Paternal	Female	2016-02-29	Epilepsy	Early childhood	NAFE	Focal onset, behavior arrest	NA	No treatment	No treatment	No treatment	No	Focal epilepsy discharge in right frontal lobe	The A1 segment of the bilateral anterior cerebral artery was thinner, and the right transverse sinus and sigmoid sinus were thinner than the left	Wide eye distance, small cracks	Normal	Father:seizures
D314	D314_C1	SYNE1	c.24613A>G, p.R8205G	Missense	De novo	Female	2006-11-28	Epilepsy (JME), SE	Adolescent	NAFE	Focal onset, myoclonic	No	VPA, LTG	Seizure free at 12y7m	LTG	No	Focal epilepsy discharge in Rolandic region	Normal	Cutaneous hemangioma	Normal	Grandparents are close relatives (Cousins)
D266	D266_C1	SYNE1	c.G18815T,p.G6272V	Missense	Maternal	Male	2007-09-18	Epilepsy	Early childhood	NAFE	Focal onset, tonic, tonic-clnic	No	CBZ	Seizure free at 8y5m	CBZ	ADHD	No recorded epileptic discharge	Normal	Normal	Normal	Grandfather and mother: similar seizures
D544	D544_C1	SYNE1	c.C1650G,p.S550R	Missense	Maternal	Male	2016-08-29	Epilepsy	Toddler	GGE	Generalized onset, absence	No	VPA	Seizure free at 2y5m	VPA	No	No recorded epileptic discharge	NA	Cafe-au-Lait Spots in trunk	Normal	Uncle: FS
D285	D285_C1	CRTC2	c.172C > T，p.R58X	Nonsense	De novo	Male	2007-06-24	Epilepsy, ID, ASD, Arachnoid cyst, Thyroid dysfunction	Adolescent	DEE	Generalized onset, tonic-clonic	No	No treatment	No treatment	No treatment	ID, ASD, thyroid dysfunction	Focal epilepsy discharge in occipital lobe	Arachnoid cyst	Wide eye distance and flat nose bridge	Moderate to severe ID	No
D175	D175_C1	KDM6B	c.4611G>C,p.K1537N	Missense	De novo	Male	2014-10-16	Epilepsy (SE), ID	Early childhood	DEE	Focal onset, tonic-clonic	Yes	VPA, LEV, TPM, CLZ, Ketogenic diet	Seizure free at 5y	Ketogenic diet	ID	Multifocal epilepsy discharge	Lateral ventricle dilation	Normal	Moderate to severe ID	Mother: febrile seizure
D329	D329_C1	CDC45	c.1066C>G，p.Q356E	Missense	Maternal	Female	2014-01-01	Epilepsy	Early childhood	GGE	Generalized onset, tonic-clonic	No	LEV	Seizure free at 5y6m	LEV	No	Extensive epilepsy discharge	Malacia in splenium of corpus callosum	Normal	Normal	Mother: febrile seizures
D455	D455_C1	CDC45	c.1066C>G，p.Q356E	Missense	Maternal	Male	2014-11-05	Epilepsy (GEFS+), ID, congenital cataract	Toddler	DEE	Focal onset, tonic-clonic	NA	No treatment	No treatment	No treatment	ID, congenital cataract	Focal epilepsy discharge in occipital lobe	Normal	Horizontal tremor in both eyes and strabismus	Moderate to severe ID	Mother: febrile seizure
D176	D176_C1	ZFHX3	c.C10084G,p.Q3362E	Missense	Maternal	Male	2005-04-02	Epilepsy	Adolescent	NAFE	Focal onset, behavior arrest	No	OXC	Seizure free at 13y2m	OXC	ADHD	A few paroxysmal spinous slow waves	Normal	Normal	Normal	No family history of convulsions. Mother: sleep disorder
D045	D045_C1	ZFHX3	c.C6377T,p.A2126V	Missense	Paternal	Male	2010-11-06	Epilepsy	Early childhood	GGE	Generalized onset, absence	No	VPA, LEV	Seizure free at 5y9m	VPA	No	Extensive epilepsy discharge	Left frontal parietal gliosis	Cafe-au-Lait Spot in arm	Normal	Father : epilepsy (post-traumatic)
Q3	Q3_C1	ZFHX3	c.T4084C,p.C1362R	Missense	Maternal	Male	2017-02-23	Epilepsy, ID	Infancy	DEE	Generalized onset, tonic	No	LEV	Seizure free at 1y	LEV	ID	Multifocal epilepsy discharge	The extracerebral space widened and the lateral ventricles were full	Inguinal hernia, small penis	Moderate to severe ID	Mother and sister: febrile seizures
D402	D402_F	CSMD1	c.2453C>G,p.P818R	Missense	NA	Male	NA	Febrile seizures	Toddler	NA	NA	No	No treatment	No treatment	No treatment	No	NA	NA	Normal	Normal	Daughter: Epilepsy,Migraine
D516	D516_M	CSMD1	c.G1654C,p.E552Q	Missense	NA	Female	NA	Febrile seizures	NA	NA	NA	NA	NA	NA	NA	NA	NA	NA	NA	NA	Son: epilepsy
D324	D324_F	RASGRP2	c.1627C>T,p.R543C	Missense	NA	Male	NA	Epilepsy	Middle childhood	NA	Focal onset, tonic	NA	NA	NA	NA	NA	NA	NA	NA	NA	Son: epilepsy
D504	D504_G	SYNE1	c.A25508G,p.N8503S	Missense	NA	Female	NA	Epilepsy	Adolescent	NA	NA	No	PHT	Seizure free	PHT	NA	NA	NA	NA	NA	Granddaughter: epilepsy
D191	D191_M	ZFHX3	c.C5159T,p.A1720V	Missense	NA	Female	NA	Febrile seizures	Toddler	NA	NA	NA	NA	NA	NA	NA	NA	NA	NA	NA	Son: epilepsy
D555	D555_M	ZFHX3	c.C5159T,p.A1720V	Missense	NA	Female	NA	Febrile seizures	NA	NA	NA	NA	NA	NA	NA	NA	NA	NA	NA	NA	Daughter: Epilepsy
D045	D045_F	CSMD1	c.891C>G, p.D297E	Missense	NA	Male	NA	Epilepsy (post-traumatic)	NA	NA	NA	NA	NA	NA	NA	NA	NA	NA	NA	NA	Son: epilepsy
D308	D308_C2	BCAR3	c.2003C>T,p.A668V	Missense	Paternal	Male	NA	Febrile seizures	NA	NA	NA	NA	NA	NA	NA	NA	NA	NA	NA	NA	Father: febrile seizure, brother: epilepsy
		ZFHX3	c.G5488C,p.G1830R	Missense	Paternal
D148	D148_M	PLEKHM3	c.2236A>C，p.S746R	Missense	NA	Female	NA	Epilepsy	Infancy	NA	NA	No	No treatment	No treatment	No treatment	No	NA	NA	Normal	Normal	Daughter: Epilepsy, Intellectual disability
		RASGRP2	c.1627C>T,p.R543C	Missense	NA
D227	D227_F	KDM6B	c.2990G>A,p.R997Q	Missense	NA	Male	NA	Epilepsy	Infancy	NAFE	Focal onset, tonic	No	PB	Seizure free at 8m	PB	No	NA	NA	Normal	Normal	Nine members including two sons: epilepsy
ADHD: attention deficit hyperactivity disorder; ASD: autistic spectrum disorder; CBZ: carbamazepine; CLB: clobazam; CLZ: clonazepam; DEE: developmental and epileptic encephalopathy; EEG: electroencephalogram; ESES: electrical status epilepticus during sleep; FS: Febrile Seizure; GEFS+: genetic epilepsy with febrile seizures plus; GGE: genetic generalized epilepsy; ID: intellectual disability; IS:…
"No treatment" means that patient had not been on long-term antiseizure medication after the initial period of their convulsive attack and were only on clinical follow-up. "Ineffective" means that seizure control was not achieved using two or more anti-seizure medications.

## Sheet: Supplementary Table 7
Supplementary Table 7. The primer sequences for constructing plasmids of novel epilepsy candidates. F- forward primer, R- reverse primer
Primer Name	Sequence (5’-3’)	Application
ADCY2-WT-F	CGACTCTAGAGGATCCGCCACCATGTGGCAGGAGGCGATGC	PCR/Clone
ADCY2-WT-R	GGTGATGGTGGGATCCGGATGCCACGTTGCTCTGG	PCR/Clone
ADCY2-A253T-F	CTGCCGGCCCACATCACCATGGAGATGAAAGCGGAG	Point mutation
ADCY2-A253T-R	CTTTCATCTCCATGGTGATGTGGGCCGGCAGCAGG	Point mutation
BCAR3-WT-F	CAGGTCGACTCTAGAGGATCCGCCACCATGGCTGCAGGAAAATTTGCAAGC	PCR/Clone
BCAR3-WT-R	GTGATGGTGATGGTGGGATCCAAGCTCTGCCTGCTTTACAGGAG	PCR/Clone
BCAR3-V163L-F	CATCCCCCGACAGTTGTCTGAAAACCTTGTGCAGCGA	Point mutation
BCAR3-V163L-R	CAGACAACTGTCGGGGGATGCGGCCGTGGTACCA	Point mutation
BCAR3-A668V-F	AGACGTGGACTGTTCTGCGGCACCAGTACACC	Point mutation
BCAR3-A668V-R	CCGCAGAACAGTCCACGTCTTTTCTAACCTTG	Point mutation
BCAR3-E426Gfs*5-F	TCAACTCAGGCCAACTACTGTGAACTGAAC	Point mutation
BCAR3-E426Gfs*5-R	AGTTGGCCTGAGTTGAGCCAGGCAGAGG	Point mutation
BSCL2-WT-F	CGACTCTAGAGGATCCGCCACCATGTCTACAGAAAAGGTAGACCA	PCR/Clone
BSCL2-WT-R	GGTGATGGTGGGATCCGGAACTAGAGCAGGTGGG	PCR/Clone
BSCL2-L219R-F	CAGACCGGCTCCAGATGCTGGACACACT	Point mutation
BSCL2-L219R-R	TGGAGCCGGTCTGAGCGGTAATGCAGCAT	Point mutation
CDC45-WT-F	CAGGTCGACTCTAGAGGATCCGCCACCATGTTCGTGTCCGATTTCCGCA	PCR/Clone
CDC45-WT-R	GTGATGGTGATGGTGGGATCCGGACAGGAGGGAAATAAGTGCGT	PCR/Clone
CDC45-Q356E-F	TTCCCCTGAAGGAGGTGAAGCAGAAGTTCCAG	Point mutation
CDC45-Q356E-R	CTGCTTCACCTCCTTCAGGGGAAGACCCATGT	Point mutation
CHRNG-WT-F	CAGGTCGACTCTAGAGGATCCGCCACCATGCATGGGGGCCAGG	PCR/Clone
CHRNG-WT-R	GTGATGGTGATGGTGGGATCCGTCTGGTGAGGGCAGGTAGG	PCR/Clone
CHRNG-V118M-F	GGAGAACAACATGGACGGTGTCTTCGAGGTG	Point mutation
CHRNG-V118M-R	CACCGTCCATGTTGTTCTCCAGCACGATATCC	Point mutation
CHRNG-V258A-F	CATCTCCTCTGCCGCCATCCTCATCCACTTCCT	Point mutation
CHRNG-V258A-R	GGATGGCGGCAGAGGAGATGAGCACACAGG	Point mutation
CRTC2-WT-F	CGACTCTAGAGGATCCGCCACCATGGCGACGTCGGGGGCGAA	PCR/Clone
CRTC2-WT-R	GGTGATGGTGGGATCCTTGGAGCCGGTCACTGCGGA	PCR/Clone
CRTC2-R58X-F	AAAACTGTGACTGGCATACACAAGGAGCTCT	Point mutation
CRTC2-R58X-R	TGCCAGTCACAGTTTTTGGGCCTGTAACCGG	Point mutation
CRTC2-R200Q-F	CCAGCCAACGTGGGGGTATTCTGGATGG	Point mutation
CRTC2-R200Q-R	CCACGTTGGCTGGGCAGGATGCTGG	Point mutation
CRTC2-I617V-F	GCCTAACGTCATCCTCACAGGGGACTCCTCT	Point mutation
CRTC2-I617V-R	GAGGATGACGTTAGGCCCTGAGCCATGGC	Point mutation
KDM6B-WT-F	CGACTCTAGAGGATCCGCCACCATGCATCGGGCAGTGGACCC	PCR/Clone
KDM6B-WT-R	GGTGATGGTGGGATCCTCGCGACGTGCTGGCTGGGG	PCR/Clone
KDM6B-K1537N-F	ATGATCAACTTCTGCCTGCTGCAGTCCATG	Point mutation
KDM6B-K1537N-R	AGGCAGAAGTTGATCATCTTGAACAAGTCGGGGTC	Point mutation
KDM6B-R997Q-F	CAGTGTGGGTCGTCAGCCCCGTGAGGGCAGGGCAAAGGCCAAGGCCAAGGT	Point mutation
KDM6B-R997Q-R	TCACGGGGCTGACGACCCACACTGTCCTTACA	Point mutation
KIF1B-WT-F	CAGGTCGACTCTAGAGGATCCGCCACCATGTCGGGAGCCTCAGTGAAG	PCR/Clone
KIF1B-WT-R	GTGATGGTGATGGTGGGATCCGTATTTCGACTGGCTCGGGCAT	PCR/Clone
KIF1B-E926K-F	TGGCTGACAAGCAGCAAGATGAGATGGAGG	Point mutation
KIF1B-E926K-R	TTGCTGCTTGTCAGCCAGCTCAGTGATGTC	Point mutation
KIF1B-Y1022H-F	GCTCCTGATCATGGCTCTGGAATTCGACAGT	Point mutation
KIF1B-Y1022H-R	AGAGCCATGATCAGGAGCTTCTTCATCCGCT	Point mutation
KIF1B-R1656W-F	CAATTCCTGGGCCTCTAGTCCCTGCCCAGAA	Point mutation
KIF1B-R1656W-R	AGAGGCCCAGGAATTGGCTTCTGGGGTCTT	Point mutation
PLEKHM3-WT-F	CAGGTCGACTCTAGAGGATCCGCCACCATGGAAGCTTTGGAAGTGGATGAT	PCR/Clone
PLEKHM3-WT-R	GTGATGGTGATGGTGGGATCCGGTGTTCTGGTAGGACAGCTCGA	PCR/Clone
PLEKHM3-S746R-F	CAGGTCGACTCTAGAGGATCCGCCACCATGGAAGCTTTGGAAGTGGATGAT	Point mutation
PLEKHM3-S746R-R	GGTGTTCTGGTAGGACAGCTCGAACATGGTGCAAGCCTCCTCTAGACGCTCGTCCATGTTCAGTCTCTG	Point mutation
PPP4R1-WT-F	CAGGTCGACTCTAGAGGATCCGCCACCATGGCGGACCTCTCGCTGCT	PCR/Clone
PPP4R1-WT-R	GTGATGGTGATGGTGGGATCCGTAGGTTGAGGACGCTGTGCTCA	PCR/Clone
PPP4R1-P33S-F	GATTATTATATCTTCAGCCCTGGACTTTGTCT	Point mutation
PPP4R1-P33S-R	GGGCTGAAGATATAATAATCACATCAGACTCTGAGCTGTAGTCA	Point mutation
PPP4R1-V229I-F	AATGTTTCACATTCGAAAGGTCTGTGCTGCC	Point mutation
PPP4R1-V229I-R	CCTTTCGAATGTGAAACATTCTGCAATCGCAGCA	Point mutation
PPP4R1-N880D-F	AGGGTTCCTGACGTGCGAGTGCTGCTTGCA	Point mutation
PPP4R1-N880D-R	CACGTCAGGAACCCTGTCATTTGCTAAG	Point mutation
RASGRP2-WT-F	CAGGTCGACTCTAGAGGATCCGCCACCATGGCAGGCACCCTGGACCT	PCR/Clone
RASGRP2-WT-R	GTGATGGTGATGGTGGGATCCCAAGTGGATGTCAAACACCCCATC	PCR/Clone
RASGRP2-R543C-F	GCCACAAGCAGTGCAAGGATTGCCTGTCAGTTGAGTGTCGG	Point mutation
RASGRP2-R543C-R	CCGACACTCAACTGACAGGCAATCCTTGCACTGCTTGTGGC	Point mutation
RASGRP2-A53P-F	TCAGCTGCCGGCCAAGCTGCTCCACATCT	Point mutation
RASGRP2-A53P-R	TTGGCCGGCAGCTGAGAGGAGGGGATGT	Point mutation
SGSM2-WT-F	CAGGTCGACTCTAGAGGATCCGCCACCATGGGCAGCGCAGAGGACGCA	PCR/Clone
SGSM2-WT-R	GTGATGGTGATGGTGGGATCCCTTGTTCTCTATGAGCATCTGCACCTTG	PCR/Clone
SGSM2-R711C-F	GGACTGCCCTCCTCTTGCAATTACTCCGTGGCCTCGG	Point mutation
SGSM2-R711C-R	GCCACGGAGTAATTGCAAGAGGAGGGCAGTCCTGAGTC	Point mutation
